# Supplementary material for: A Systematic Review and Meta-Analysis of a Measure of Staff/Child Interaction Quality (the Classroom Assessment Scoring System) in Early Childhood Education and Care Settings and Child Outcomes
Source: PubMed Central journal article supplement (PMC5201239; doi:10.1371/journal.pone.0167660), 2016-12-30
Supplement: pone.0167660.s002.pdf [file pone.0167660.s002.pdf]

# A Systematic Review and Meta-Analysis of a Measure of Staff/Child Interaction Quality (the Classroom Assessment Scoring System) in Early Childhood Education and Care Settings and Child Outcomes

## Supplemental Information 2

| List of Child Outcome Variables |                    |                                                                                                                                                                                                                       |                   |                   |
|---------------------------------|--------------------|-----------------------------------------------------------------------------------------------------------------------------------------------------------------------------------------------------------------------|-------------------|-------------------|
| Outcome Category                | Number of Measures | Child Outcome Variable                                                                                                                                                                                                | Number of Studies | Number of Samples |
| Approach                        | n=1                | Galileo System for the Electronic Management of Learning - Language/Literacy                                                                                                                                          | 1                 | 1                 |
| Cognitive                       | n=5                | Backwards Digit Span (Carlson, 2005) <sup>1</sup>                                                                                                                                                                     | 2                 | 2                 |
|                                 |                    | Backwards Digit Span (Gathercole & Pickering, 2000) <sup>2</sup>                                                                                                                                                      |                   |                   |
|                                 |                    | FACES - Social Awareness Task                                                                                                                                                                                         | 2                 | 2                 |
|                                 |                    | Forward Digit Span                                                                                                                                                                                                    | 1                 | 1                 |
|                                 |                    | Identifying Colors                                                                                                                                                                                                    | 1                 | 1                 |
|                                 |                    | Working Memory Task                                                                                                                                                                                                   | 1                 | 1                 |
| Language                        | n=26               | Academic Rating Scale: Language & Literacy                                                                                                                                                                            | 4                 | 5                 |
|                                 |                    | Expressive One Word Picture Vocabulary Test (English - EOWPVT)                                                                                                                                                        | 1                 | 1                 |
|                                 |                    | Expressive One Word Picture Vocabulary Test (Spanish – EOWPVT-SBE)                                                                                                                                                    |                   |                   |
|                                 |                    | Identifying Letters (Letter Knowledge, Letter-Naming, Letter naming Test, Naming Letters)                                                                                                                             | 8                 | 9                 |
|                                 |                    | Language (PPVT and WJ Picture Vocabulary)                                                                                                                                                                             | 1                 | 1                 |
|                                 |                    | MUBI                                                                                                                                                                                                                  | 1                 | 1                 |
|                                 |                    | Narrative Assessment Protocol (NAP)                                                                                                                                                                                   | 2                 | 2                 |
|                                 |                    | Narrative Assessment Protocol-SF (12 items)                                                                                                                                                                           |                   |                   |
|                                 |                    | Oral & Written Language Scales - Oral Expression Scale (OWLS)                                                                                                                                                         | 8                 | 8                 |
|                                 |                    | Oral & Written Language Scales - Total Scale (OWLS)                                                                                                                                                                   | 3                 | 3                 |
|                                 |                    | PALS Pre-K – Lower Case Recognition (PALS Pre-K)                                                                                                                                                                      | 1                 | 1                 |
|                                 |                    | PALS Pre-K - Total mean score (PALS Pre-K)                                                                                                                                                                            | 1                 | 1                 |
|                                 |                    | Peabody Picture Vocabulary Test (English, PPVT-4)                                                                                                                                                                     | 25                | 27                |
|                                 |                    | Peabody Picture Vocabulary Test - III (PPVT)                                                                                                                                                                          |                   |                   |
|                                 |                    | Test de Vocabulario en Imagenes Peabody (Spanish, TVIP)                                                                                                                                                               |                   |                   |
|                                 |                    | Pre-CTOPP - Phonological Awareness (Pre-CTOPP)                                                                                                                                                                        | 1                 | 1                 |
|                                 |                    | Pre-CTOPP - Print Awareness (Pre-CTOPP)                                                                                                                                                                               | 1                 | 1                 |
|                                 |                    | Pre-CTOPP - Receptive Vocabulary (Pre-CTOPP)                                                                                                                                                                          | 1                 | 1                 |
|                                 |                    | Print Awareness: Composite score Preschool Word and Print Awareness test (PWPA) and two Phonological Awareness Literacy Screening: Pre-Kindergarten (PALS) measures: Alphabet Knowledge subtest, Name Writing Subtest | 2                 | 2                 |
|                                 |                    | Print Knowledge: Composite score Preschool Word and Print Awareness test (PWPA) and one Phonological Awareness Literacy Screening: Pre-Kindergarten                                                                   | 1                 | 1                 |

**A Systematic Review and Meta-Analysis of a Measure of Staff/Child Interaction Quality  
(the Classroom Assessment Scoring System) in Early Childhood Education and Care  
Settings and Child Outcomes**

| <b>List of Child Outcome Variables</b> |                           |                                                                                                  |                          |                          |
|----------------------------------------|---------------------------|--------------------------------------------------------------------------------------------------|--------------------------|--------------------------|
| <b>Outcome Category</b>                | <b>Number of Measures</b> | <b>Child Outcome Variable</b>                                                                    | <b>Number of Studies</b> | <b>Number of Samples</b> |
|                                        |                           | (PALS) measures: Upper Case Alphabet Knowledge subtest                                           |                          |                          |
|                                        |                           | TOPEL - Phonological Awareness                                                                   | 2                        | 2                        |
|                                        |                           | TOPEL - Print Knowledge                                                                          | 1                        | 1                        |
|                                        |                           | TOPEL - (Phonological Awareness + Print Knowledge)                                               | 1                        | 1                        |
|                                        |                           | TOPEL - Total Score (Print Knowledge, Definitional Vocabulary, and Phonological Awareness)       | 1                        | 1                        |
|                                        |                           | Woodcock Johnson - Letter Word Identification III (English, WJ LWI)                              | 10                       | 12                       |
|                                        |                           | Woodcock Johnson - Letter Word Identification (Spanish, WM LWI)                                  |                          |                          |
|                                        |                           | Woodcock Johnson - Picture Vocabulary III (WJ, English)                                          | 2                        | 2                        |
|                                        |                           | Woodcock Johnson - Picture Vocabulary (WJ, Spanish)                                              |                          |                          |
|                                        |                           | Woodcock Johnson - Rhyming (English, WJ)                                                         | 5                        | 5                        |
|                                        |                           | Woodcock Johnson - Rhyming (Spanish, WM)                                                         |                          |                          |
|                                        |                           | Woodcock Johnson - Sound Awareness (WJ)                                                          | 1                        | 1                        |
|                                        |                           | Woodcock Johnson - Spelling (English, WJ)                                                        | 1                        | 1                        |
|                                        |                           | Woodcock Johnson - Spelling (Spanish, WM)                                                        |                          |                          |
|                                        |                           | Woodcock Johnson - Word Attack (WJ)                                                              | 1                        | 1                        |
| <b>Math</b>                            | n=4                       | Counting Task                                                                                    | 2                        | 2                        |
|                                        |                           | Early Childhood Longitudinal Study-Birth Cohort - Math (ECLS-B)                                  | 3                        | 3                        |
|                                        |                           | Identifying Numbers (Naming Numbers)                                                             | 2                        | 2                        |
|                                        |                           | Woodcock Johnson - Applied Problems III (English, WJ AP)                                         | 21                       | 24                       |
|                                        |                           | Bateria psico-educativa revisada de woodcock-Munoz - Revisada- Applied Problems (Spanish, WM AP) |                          |                          |
| <b>Positive Behaviour</b>              | n=10                      | Adaptive Social Behaviour Inventory - Prosocial Behaviour (express & comply) (ASBI)              | 1                        | 1                        |
|                                        |                           | Early Childhood Longitudinal Study-Kindergarten Cohort - Approaches to Learning (ECLS-K)         | 1                        | 1                        |
|                                        |                           | Learning Self-Efficacy                                                                           | 1                        | 1                        |
|                                        |                           | Executive Functioning Pencil Tapping Task                                                        | 3                        | 3                        |
|                                        |                           | Social Skills (author created)                                                                   | 1                        | 1                        |
|                                        |                           | Social Skills Improvement System - Social Skills (SSIS)                                          | 2                        | 2                        |
|                                        |                           | Social Skills and Problem Behaviour Scale - Social Competence (SSPBS)                            | 1                        | 1                        |
|                                        |                           | Social Skills Rating System - Social Skills (Teacher, SSRS)                                      | 4                        | 4                        |
|                                        |                           | Student Teacher Rating Scale – Closeness (TRS)                                                   | 1                        | 1                        |

**A Systematic Review and Meta-Analysis of a Measure of Staff/Child Interaction Quality  
(the Classroom Assessment Scoring System) in Early Childhood Education and Care  
Settings and Child Outcomes**

| <b>List of Child Outcome Variables</b> |                           |                                                                        |                          |                          |
|----------------------------------------|---------------------------|------------------------------------------------------------------------|--------------------------|--------------------------|
| <b>Outcome Category</b>                | <b>Number of Measures</b> | <b>Child Outcome Variable</b>                                          | <b>Number of Studies</b> | <b>Number of Samples</b> |
|                                        |                           | Teacher Child Rating Scale - Social Competence (TCRS)                  | 10                       | 11                       |
| <b>Problem Behaviour</b>               | n=9                       | Behaviour Problems Composite                                           | 2                        | 2                        |
|                                        |                           | Behaviour Problems Composite                                           | 1                        | 1                        |
|                                        |                           | Social Skills Improvement System - Externalizing Problems (SSIS)       | 1                        | 1                        |
|                                        |                           | Social Skills Improvement System - Internalizing Problems (SSIS)       | 1                        | 1                        |
|                                        |                           | Social Skills Improvement System - Problem Behaviours (SSIS)           | 1                        | 1                        |
|                                        |                           | Social Skills and Problem Behaviour Scale – Problem Behaviours (SSPBS) | 1                        | 1                        |
|                                        |                           | Social Skills Rating System - Problem Behaviours (SSRS)                | 2                        | 2                        |
|                                        |                           | Student Teacher Rating Scale – Conflict (TRS)                          | 1                        | 1                        |
|                                        |                           | Teacher Child Rating Scale - Behaviour Problems (TCRS)                 | 8                        | 9                        |
| <b>Total #</b>                         | 55                        |                                                                        |                          |                          |
