# Supplementary material for: A Systematic Review and Meta-Analysis of a Measure of Staff/Child Interaction Quality (the Classroom Assessment Scoring System) in Early Childhood Education and Care Settings and Child Outcomes
Source: PubMed Central journal article supplement (PMC5201239; doi:10.1371/journal.pone.0167660), 2016-12-30
Supplement: pone.0167660.s003.pdf [file pone.0167660.s003.pdf]

**A Systematic Review and Meta-Analysis of a Measure of Staff/Child Interaction Quality  
(the Classroom Assessment Scoring System) in Early Childhood Education and Care  
Settings and Child Outcomes**

**Supplemental Information 3  
Formulas for Converting Statistics to  $r$  for Meta Analyses**

---

Conversion to  $t$ ,  $d$  or  $r$  through  $t$ -statistic

$$t = \frac{B}{SE(B)}$$

$$d = \frac{2t}{\sqrt{n-1}}$$

$$r = \frac{d}{\sqrt{d^2 + 4}}$$

where  $B$  is an unstandardized regression coefficient,  $SE(B)$  is its standard error,  $d$  is its standardized mean difference,  $r$  is the correlation effect size, and  $n$  is sample size.
