# Supplementary material for: A Systematic Review and Meta-Analysis of a Measure of Staff/Child Interaction Quality (the Classroom Assessment Scoring System) in Early Childhood Education and Care Settings and Child Outcomes
Source: PubMed Central journal article supplement (PMC5201239; doi:10.1371/journal.pone.0167660), 2016-12-30
Supplement: pone.0167660.s004.pdf [file pone.0167660.s004.pdf]

# A Systematic Review and Meta-Analysis of a Measure of Staff/Child Interaction Quality (the Classroom Assessment Scoring System) in Early Childhood Education and Care Settings and Child Outcomes

## Supplemental Information 4 Systematic Review Results: All Outcomes

| <b>Table A. CLASS Predicting all Approach, Cognitive, and Math Outcomes</b> |                               |                                                  |                        |                     |                               |                    |                     |                     |               |                 |                                  |                     |           |
|-----------------------------------------------------------------------------|-------------------------------|--------------------------------------------------|------------------------|---------------------|-------------------------------|--------------------|---------------------|---------------------|---------------|-----------------|----------------------------------|---------------------|-----------|
| <b>CLASS Measurement Level</b>                                              |                               | <b>STUDY<sup>a,b</sup></b>                       | <b>APP<sup>c</sup></b> | <b>COGNITIVE</b>    |                               |                    |                     |                     | <b>MATH</b>   |                 |                                  |                     |           |
|                                                                             |                               |                                                  | Galileo                | Backward Digit Span | FACES - Social Awareness Task | Forward Digit Span | Identifying Colours | Working Memory Task | Counting Task | ECLS-B Math     | Identifying Numbers <sup>d</sup> | WJ Applied Problems |           |
| <b>Total Score</b>                                                          | <b>Factor Version</b>         | Burchinal 2011 <sup>3</sup> - NCEDL <sup>A</sup> |                        |                     |                               |                    |                     |                     |               |                 |                                  | ■ ■ %               |           |
|                                                                             | <b>9 scale Version</b>        | Sabol 2013 <sup>4,A</sup>                        |                        |                     |                               |                    |                     |                     |               |                 |                                  | ★ ○                 |           |
| <b>CLASS Domains</b>                                                        | <b>Classroom Organization</b> | Aikens 2012 <sup>5,M</sup>                       |                        |                     |                               |                    |                     |                     |               | ■ ■ ■ ■ ■ ■ ■ ■ |                                  | ■ ■ ■ ■ ■ ■ ■ ■ ↓   |           |
|                                                                             |                               | Bulotsky-Shearer 2014 <sup>6</sup>               |                        |                     |                               |                    |                     |                     |               |                 |                                  | ★ ■                 |           |
|                                                                             |                               | Burchinal 2014 <sup>7</sup>                      |                        |                     |                               |                    |                     | ★ ■ ■ ■ ●           |               |                 |                                  | ★ ■ ■ ■ ●           |           |
|                                                                             |                               | Dominguez 2010 <sup>8</sup>                      | ■ ■                    |                     |                               |                    |                     |                     |               |                 |                                  |                     |           |
|                                                                             |                               | Downer 2012 <sup>9</sup> - DLL <sup>A</sup>      |                        |                     |                               |                    |                     |                     |               |                 |                                  |                     | ■         |
|                                                                             |                               | Downer 2012 <sup>9</sup> - Latino <sup>A</sup>   |                        |                     |                               |                    |                     |                     |               |                 |                                  |                     | ■         |
|                                                                             |                               | Hamre 2014 <sup>10</sup>                         |                        | ■                   |                               |                    |                     |                     |               |                 |                                  |                     |           |
|                                                                             |                               | Peisner-Feinberg 2008 <sup>11</sup> - NC 07/08   |                        |                     |                               | ◆                  |                     |                     |               | ◆               |                                  |                     | ◆         |
|                                                                             |                               | Peisner-Feinberg 2013 <sup>12</sup>              |                        |                     |                               | ■                  |                     |                     |               | ■               |                                  |                     | ■         |
|                                                                             |                               | Weiland 2013 <sup>13</sup>                       |                        |                     | ■ ■ ■                         |                    |                     | ■ ■ ■               |               |                 |                                  |                     |           |
|                                                                             | <b>Emotional Support</b>      | Bulotsky-Shearer 2014 <sup>6</sup>               |                        |                     |                               |                    |                     |                     |               |                 |                                  |                     | ★ ■       |
|                                                                             |                               | Burchinal 2014 <sup>7</sup>                      |                        |                     |                               |                    |                     | ★ ■ ■ ■ ●           |               |                 |                                  |                     | ★ ■ ■ ■ ● |
|                                                                             |                               | Curby 2013 <sup>14,A</sup>                       |                        |                     |                               |                    |                     |                     |               |                 |                                  |                     | ★ ■ ■     |
|                                                                             |                               | Dominguez 2010 <sup>8</sup>                      | ■ ■                    |                     |                               |                    |                     |                     |               |                 |                                  |                     |           |
|                                                                             |                               | Downer 2012 <sup>9</sup> - DLL <sup>A</sup>      |                        |                     |                               |                    |                     |                     |               |                 |                                  |                     | ■         |



## A Systematic Review and Meta-Analysis of a Measure of Staff/Child Interaction Quality (the Classroom Assessment Scoring System) in Early Childhood Education and Care Settings and Child Outcomes

|                                   |                          |                                                                     |                                   |  |  |                       |   |  |                                             |   |              |
|-----------------------------------|--------------------------|---------------------------------------------------------------------|-----------------------------------|--|--|-----------------------|---|--|---------------------------------------------|---|--------------|
|                                   |                          | Burchinal 2012 <sup>19</sup> - Whole Sample <sup>A</sup>            |                                   |  |  |                       |   |  |                                             |   | ■            |
|                                   |                          | Burchinal 2012 <sup>19</sup> - Spanish-English Testing <sup>A</sup> |                                   |  |  |                       |   |  |                                             |   | ★            |
|                                   |                          | Burchinal 2012 <sup>19</sup> - Spanish-Spanish Testing <sup>A</sup> |                                   |  |  |                       |   |  |                                             |   | ★            |
|                                   |                          | Dang 2011 <sup>25</sup> - NCEDL <sup>A</sup>                        |                                   |  |  |                       |   |  |                                             |   | ■            |
|                                   |                          | Dotterer 2012 <sup>20,A</sup>                                       |                                   |  |  |                       |   |  |                                             | ■ | ■            |
|                                   |                          | Early 2006 <sup>21,A</sup>                                          |                                   |  |  |                       | ★ |  |                                             | ★ | ★            |
|                                   |                          | Howes 2008 <sup>22,A</sup>                                          |                                   |  |  |                       |   |  |                                             |   | ■★           |
|                                   |                          | Keys 2013 <sup>26</sup> - NCEDL <sup>A</sup>                        |                                   |  |  |                       |   |  |                                             |   | ■            |
|                                   |                          | Mashburn, Pianta 2008 <sup>23,A</sup>                               |                                   |  |  |                       |   |  |                                             |   | ■            |
| <b>Subscales</b>                  | <b>Language Modeling</b> | Aikens 2010 <sup>16,B</sup>                                         |                                   |  |  |                       |   |  | ○○○○                                        |   | ○○○○         |
|                                   |                          | Aikens 2012 <sup>5,M</sup>                                          |                                   |  |  |                       |   |  | ■/■/■                                       |   | ■/■/■/■/■/■↓ |
| <b>Legend for Table</b>           |                          |                                                                     |                                   |  |  |                       |   |  |                                             |   |              |
| <b>Significant &amp; Positive</b> |                          |                                                                     | <b>Significant &amp; Negative</b> |  |  | <b>Nonsignificant</b> |   |  | <b>Statistic</b>                            |   |              |
| ★                                 |                          |                                                                     | ★                                 |  |  | ★                     |   |  | <b>r - Zero Order Pearson's Correlation</b> |   |              |
| ○                                 |                          |                                                                     | ○                                 |  |  | ○                     |   |  | <b>Beta</b>                                 |   |              |
| ■                                 |                          |                                                                     | ■                                 |  |  | ■                     |   |  | <b>B (Unstandardized Coefficient)</b>       |   |              |
| ❖                                 |                          |                                                                     | ❖                                 |  |  | ❖                     |   |  | <b>T-Test</b>                               |   |              |
| ⌘                                 |                          |                                                                     | ⌘                                 |  |  | ⌘                     |   |  | <b>Partial Correlation</b>                  |   |              |
| ●                                 |                          |                                                                     | ●                                 |  |  | ●                     |   |  | <b>F-Ratio</b>                              |   |              |
| ↓                                 |                          |                                                                     | ↓                                 |  |  | ↓                     |   |  | <b>Effect Size</b>                          |   |              |

Abbreviations: APP=Approaches to Learning; Total Score (factor ver.) = Total Score for Emotional Climate and Instructional Climate; Total Score (9 scale ver.)=Total Score with Language Modeling, Literacy Focus subscales not included. For more details please see Table 2 in the manuscript.

<sup>a</sup>This paper is one of a series of Meta-Analyses and Systematic Reviews assessing the relationship between child care quality and children's outcomes; therefore, superscript letters below are in reference to various large databases that samples in these papers were drawn from. These letters have been kept consistent across the series for our readers.

<sup>b</sup>Samples within papers are described in more detail in the manuscript in Table 2.

<sup>c</sup>Acronyms for child outcomes are listed in Supplemental Information 2.

<sup>d</sup>Identifying Numbers (also refers to as Naming Numbers).

<sup>A</sup>National Center for Early Development and Learning Dataset (NCEDL); <sup>B</sup>Head Start Family and Children Experiences Survey (FACES) 2006 Cohort; <sup>M</sup>Head Start Family and Children Experiences Survey (FACES, 2009) Cohort.

# A Systematic Review and Meta-Analysis of a Measure of Staff/Child Interaction Quality (the Classroom Assessment Scoring System) in Early Childhood Education and Care Settings and Child Outcomes

## Supplemental Information 4 Systematic Review Results: All Outcomes

| <b>Table B. CLASS Predicting all Language Outcomes A to P</b> |                               |                                                  | <b>LANGUAGE<sup>c</sup></b>         |                                  |                        |      |                               |                             |                   |            |                                     |                   |                                   |                            |                                 |                                       |                                       |  |
|---------------------------------------------------------------|-------------------------------|--------------------------------------------------|-------------------------------------|----------------------------------|------------------------|------|-------------------------------|-----------------------------|-------------------|------------|-------------------------------------|-------------------|-----------------------------------|----------------------------|---------------------------------|---------------------------------------|---------------------------------------|--|
| <b>CLASS Measurement Level</b>                                | <b>STUDY<sup>a, b</sup></b>   |                                                  |                                     |                                  |                        |      |                               |                             |                   |            |                                     |                   |                                   |                            |                                 |                                       |                                       |  |
|                                                               |                               | ARS - Language & Literacy                        | Expressive One - Picture Vocabulary | Identifying Letters <sup>d</sup> | Language (PPVT+ WJ PV) | MUBI | Narrative Assessment Protocol | OWLS- Oral Expression Scale | OWLS- Total Scale | PALS Pre-K | PALS Pre-K - lower case recognition | PPVT - Vocabulary | Pre-CTOPP -Phonological Awareness | Pre-CTOPP -Print Awareness | Pre-CTOPP -Receptive Vocabulary | Print Awareness (PWPA and PALS Pre-K) | Print Knowledge (PWPA and PALS Pre-K) |  |
| <b>Total Score</b>                                            | <b>Factor Version</b>         | Burchinal 2011 <sup>3</sup> - NCEDL <sup>A</sup> |                                     |                                  |                        |      |                               |                             | ⌘                 |            |                                     |                   |                                   | ⌘ ■                        |                                 |                                       |                                       |  |
|                                                               | <b>11 Scale Version</b>       | McGinty 2012 <sup>27,X</sup>                     |                                     |                                  |                        |      |                               |                             |                   |            |                                     |                   |                                   |                            |                                 |                                       | ■                                     |  |
|                                                               | <b>9 Scale Version</b>        | Sabol 2013 <sup>4,A</sup>                        |                                     |                                  | ○ ★                    |      |                               |                             | ○ ★               |            |                                     |                   |                                   | ○ ★                        |                                 |                                       |                                       |  |
|                                                               | <b>8 Scale Version</b>        | Hamre 2010 <sup>28</sup>                         |                                     |                                  |                        |      |                               |                             |                   | ■          |                                     |                   |                                   | ■                          | ■                               | ■                                     |                                       |  |
| <b>CLASS Domains</b>                                          | <b>Classroom Organization</b> | Aikens 2012 <sup>5,M</sup>                       |                                     | ■ ■ ■<br>■ ■<br>←                |                        |      |                               |                             |                   |            |                                     |                   |                                   | ■ ■ ■<br>■ ■<br>←          |                                 |                                       |                                       |  |
|                                                               |                               | Burchinal 2014 <sup>7</sup>                      |                                     |                                  |                        |      |                               |                             |                   |            |                                     |                   |                                   | ★                          |                                 |                                       |                                       |  |



## A Systematic Review and Meta-Analysis of a Measure of Staff/Child Interaction Quality (the Classroom Assessment Scoring System) in Early Childhood Education and Care Settings and Child Outcomes

|                                                   |                                                               |                                                             |                     |   |   |   |   |            |  |   |                     |         |  |  |     |  |
|---------------------------------------------------|---------------------------------------------------------------|-------------------------------------------------------------|---------------------|---|---|---|---|------------|--|---|---------------------|---------|--|--|-----|--|
| <b>Support</b>                                    | Aikens 2012 <sup>5</sup>                                      |                                                             | ■ ■ ■ ■<br>■ ■<br>↓ |   |   |   |   |            |  |   | ■ ■ ■ ■<br>■ ■<br>↓ |         |  |  |     |  |
|                                                   | Burchinal 2014 <sup>7</sup>                                   |                                                             |                     |   |   |   |   |            |  |   | ★<br>■ ■ ■ ●<br>●   |         |  |  |     |  |
|                                                   | Gosse 2014 <sup>31</sup>                                      |                                                             |                     |   |   | ■ |   |            |  |   |                     |         |  |  |     |  |
|                                                   | Guo 2010 <sup>30,A</sup>                                      |                                                             |                     |   |   |   |   |            |  |   | ■ ■                 |         |  |  | ■ ■ |  |
|                                                   | Hamre 2014 <sup>10</sup>                                      |                                                             |                     |   | ■ |   |   |            |  |   |                     |         |  |  |     |  |
|                                                   | Logan 2011 <sup>32</sup> -<br>Head Start                      |                                                             |                     |   |   |   | ■ |            |  |   |                     |         |  |  |     |  |
|                                                   | Logan 2011 <sup>32</sup> -<br>State Funded                    |                                                             |                     |   |   | ■ |   |            |  |   |                     |         |  |  |     |  |
|                                                   | Peisner-Feinberg<br>2008 <sup>11</sup> - NC 07/08             |                                                             |                     |   |   |   |   |            |  |   |                     | ◇       |  |  |     |  |
|                                                   | Peisner-Feinberg<br>2013 <sup>12</sup>                        |                                                             |                     |   | ■ |   |   |            |  |   |                     |         |  |  |     |  |
|                                                   | Weiland 2013 <sup>13</sup>                                    |                                                             |                     |   |   |   |   |            |  |   |                     | ■ ■ ■ ■ |  |  |     |  |
|                                                   | West 2010 <sup>17,B</sup>                                     |                                                             |                     |   |   |   |   |            |  |   |                     | ○ ○     |  |  |     |  |
|                                                   | Xu 2014 <sup>29</sup>                                         |                                                             |                     |   |   |   |   |            |  | ○ |                     | ○       |  |  |     |  |
|                                                   | <b>Instructional Support (Language Modeling not included)</b> | Downer 2012 <sup>9</sup> -<br>DLL <sup>A</sup>              | ■                   |   | ■ |   |   |            |  |   |                     |         |  |  |     |  |
| Downer 2012 <sup>9</sup> -<br>Latino <sup>A</sup> |                                                               | ■                                                           |                     | ■ |   |   |   |            |  |   |                     |         |  |  |     |  |
| Reid 2013 <sup>15,A</sup>                         |                                                               |                                                             |                     |   |   |   |   | ○          |  |   | ○                   |         |  |  |     |  |
| <b>CLASS Factors</b>                              | <b>Emotional Climate</b>                                      | Burchinal 2010 <sup>18,A</sup>                              |                     |   |   |   |   | ■ ■<br>◇ ◇ |  |   | ■ ■<br>◇ ◇          |         |  |  |     |  |
|                                                   |                                                               | Burchinal 2012 <sup>19</sup> -<br>Whole Sample <sup>A</sup> |                     |   |   |   |   |            |  |   | ■                   |         |  |  |     |  |
|                                                   |                                                               | Burchinal 2012 <sup>19</sup> -<br>Spanish-English           |                     |   |   |   |   |            |  |   |                     | ★       |  |  |     |  |

## A Systematic Review and Meta-Analysis of a Measure of Staff/Child Interaction Quality (the Classroom Assessment Scoring System) in Early Childhood Education and Care Settings and Child Outcomes

|                              |  |                                                                     |    |  |    |  |  |  |            |    |  |  |            |    |  |  |  |  |  |
|------------------------------|--|---------------------------------------------------------------------|----|--|----|--|--|--|------------|----|--|--|------------|----|--|--|--|--|--|
|                              |  | Testing <sup>A</sup>                                                |    |  |    |  |  |  |            |    |  |  |            |    |  |  |  |  |  |
|                              |  | Burchinal 2012 <sup>19</sup> - Spanish-Spanish Testing <sup>A</sup> |    |  |    |  |  |  |            |    |  |  | ★          |    |  |  |  |  |  |
|                              |  | Dotterer 2012 <sup>20,A</sup>                                       | ■  |  | ■  |  |  |  | ■          |    |  |  | ■          |    |  |  |  |  |  |
|                              |  | Early 2006 <sup>21,A</sup>                                          |    |  | ★  |  |  |  | ★          |    |  |  | ★          |    |  |  |  |  |  |
|                              |  | Howes 2008 <sup>22,A</sup>                                          | ■★ |  | ■★ |  |  |  | ■★         |    |  |  | ■★         |    |  |  |  |  |  |
|                              |  | Mashburn, Pianta 2008 <sup>23,A</sup>                               |    |  | ■  |  |  |  | ■          |    |  |  | ■          |    |  |  |  |  |  |
|                              |  | Mashburn 2009 <sup>33,A</sup>                                       |    |  |    |  |  |  | ■          |    |  |  | ■          |    |  |  |  |  |  |
| <b>Instructional Climate</b> |  | Burchinal 2008 <sup>24,A</sup>                                      | ★  |  |    |  |  |  | ★          |    |  |  | ★          |    |  |  |  |  |  |
|                              |  | Burchinal 2010 <sup>18,A</sup>                                      |    |  |    |  |  |  | ■ ■<br>◆ ◆ |    |  |  | ■ ■<br>◆ ◆ |    |  |  |  |  |  |
|                              |  | Burchinal 2011 <sup>3</sup> - NCEDL <sup>A</sup>                    |    |  |    |  |  |  |            |    |  |  | ⌘          |    |  |  |  |  |  |
|                              |  | Burchinal 2012 <sup>19</sup> - Whole Sample <sup>A</sup>            |    |  |    |  |  |  |            |    |  |  | ■          |    |  |  |  |  |  |
|                              |  | Burchinal 2012 <sup>19</sup> - Spanish English Testing <sup>A</sup> |    |  |    |  |  |  |            |    |  |  |            | ★  |  |  |  |  |  |
|                              |  | Burchinal 2012 <sup>19</sup> - Spanish-Spanish Testing <sup>A</sup> |    |  |    |  |  |  |            |    |  |  |            | ★  |  |  |  |  |  |
|                              |  | Burchinal 2012 <sup>19</sup> - Whole Sample <sup>A</sup>            |    |  |    |  |  |  |            |    |  |  |            | ■  |  |  |  |  |  |
|                              |  | Dang 2011 <sup>25</sup> - NCEDL <sup>A</sup>                        |    |  |    |  |  |  |            |    |  |  |            | ■  |  |  |  |  |  |
|                              |  | Dotterer 2012 <sup>20,A</sup>                                       | ■  |  | ■  |  |  |  |            | ■  |  |  |            | ■  |  |  |  |  |  |
|                              |  | Early 2006 <sup>21,A</sup>                                          |    |  | ★  |  |  |  |            | ★  |  |  |            | ★  |  |  |  |  |  |
|                              |  | Howes 2008 <sup>22,A</sup>                                          | ■★ |  | ■★ |  |  |  |            | ■★ |  |  |            | ■★ |  |  |  |  |  |
|                              |  | Keys 2013 <sup>26</sup> - NCEDL <sup>A</sup>                        |    |  |    |  |  |  |            |    |  |  |            | ■  |  |  |  |  |  |
|                              |  | Mashburn, Pianta 2008 <sup>23,A</sup>                               |    |  | ■  |  |  |  |            | ■  |  |  |            | ■  |  |  |  |  |  |

## A Systematic Review and Meta-Analysis of a Measure of Staff/Child Interaction Quality (the Classroom Assessment Scoring System) in Early Childhood Education and Care Settings and Child Outcomes

|                                 |                             |                                  |   |         |                                 |  |  |  |  |                       |  |   |         |         |                                      |  |  |   |  |
|---------------------------------|-----------------------------|----------------------------------|---|---------|---------------------------------|--|--|--|--|-----------------------|--|---|---------|---------|--------------------------------------|--|--|---|--|
| <b>Subscales</b>                | <b>Behaviour Management</b> | Dobbs-Oates 2011 <sup>34,X</sup> |   |         |                                 |  |  |  |  |                       |  |   | ■ ■ ■ ■ |         |                                      |  |  | ■ |  |
|                                 |                             | Guo 2014 <sup>35,U</sup>         |   |         |                                 |  |  |  |  |                       |  |   |         | ■       |                                      |  |  |   |  |
|                                 | <b>Language Modeling</b>    | Aikens 2010 <sup>16,B</sup>      |   |         |                                 |  |  |  |  |                       |  |   |         | ○ ○     |                                      |  |  |   |  |
|                                 |                             | Aikens 2012 <sup>5</sup>         |   | ■ ■ ■ ■ |                                 |  |  |  |  |                       |  |   |         | ■ ■ ■ ■ |                                      |  |  |   |  |
|                                 |                             | Hamre 2010 <sup>28</sup>         |   | ■ ■     |                                 |  |  |  |  |                       |  |   |         | ■ ■     |                                      |  |  |   |  |
|                                 | Hamre 2010 <sup>28</sup>    |                                  | ↓ |         |                                 |  |  |  |  |                       |  | ↓ |         |         |                                      |  |  |   |  |
|                                 | <b>Literacy Focus</b>       | Hamre 2010 <sup>28</sup>         |   |         |                                 |  |  |  |  |                       |  |   |         |         |                                      |  |  |   |  |
|                                 |                             | Hamre 2010 <sup>28</sup>         |   |         |                                 |  |  |  |  |                       |  |   |         |         |                                      |  |  |   |  |
| <b>Legend for Table</b>         |                             |                                  |   |         |                                 |  |  |  |  |                       |  |   |         |         |                                      |  |  |   |  |
| <b>Significant and Positive</b> |                             |                                  |   |         | <b>Significant and Negative</b> |  |  |  |  | <b>Nonsignificant</b> |  |   |         |         | <b>Statistic</b>                     |  |  |   |  |
| ★                               |                             |                                  |   |         | ★                               |  |  |  |  | ★                     |  |   |         |         | r - Zero Order Pearson's Correlation |  |  |   |  |
| ○                               |                             |                                  |   |         | ○                               |  |  |  |  | ○                     |  |   |         |         | Beta                                 |  |  |   |  |
| ■                               |                             |                                  |   |         | ■                               |  |  |  |  | ■                     |  |   |         |         | B (Unstandardized Coefficient)       |  |  |   |  |
| ❖                               |                             |                                  |   |         | ❖                               |  |  |  |  | ❖                     |  |   |         |         | T-Test                               |  |  |   |  |
| ⌘                               |                             |                                  |   |         | ⌘                               |  |  |  |  | ⌘                     |  |   |         |         | Partial Correlation                  |  |  |   |  |
| ●                               |                             |                                  |   |         | ●                               |  |  |  |  | ●                     |  |   |         |         | F-Ratio                              |  |  |   |  |
| ↓                               |                             |                                  |   |         | ↓                               |  |  |  |  | ↓                     |  |   |         |         | Effect Size                          |  |  |   |  |

Abbreviations: Total Score (factor ver.) = Total Score for Emotional Climate and Instructional Climate; Total Score (9 scale ver.) = Total Score with Language Modeling and Literacy Focus subscales not included. Total Score (8 scale ver.) = Total score with Regard for Student Perspectives, Language Modeling, and Literacy Focus subscales not included. For more details please see Table 2 in the manuscript.

<sup>a</sup>This paper is one of a series of Meta-Analyses and Systematic Reviews assessing the relationship between child care quality and children's outcomes; therefore, superscript letters below are in reference to various large databases that samples in these papers were drawn from. These letters have been kept consistent across the series for our readers.

<sup>b</sup>Samples within papers are described in more detail in the manuscript in Table 2.

<sup>c</sup>Acronyms for child outcomes are listed in Supplemental Information 2.

<sup>d</sup>Identifying Letters (also refers to Letter Knowledge, Letter-Naming Test, and Naming Letters).

<sup>e</sup>Hamre, 2014<sup>10</sup> used only Phonological Awareness and Print Knowledge subscales.

<sup>A</sup>National Center for Early Development and Learning Dataset (NCEDL, 2002, 2004); <sup>B</sup>Head Start Family and Children Experiences Survey (FACES, 2006) Cohort; <sup>M</sup>Head Start Family and Children Experiences Survey (FACES, 2009) Cohort; <sup>X</sup>Ohio Virginia (2005-2006, 2006-2007).





## A Systematic Review and Meta-Analysis of a Measure of Staff/Child Interaction Quality (the Classroom Assessment Scoring System) in Early Childhood Education and Care Settings and Child Outcomes

|                              |                                                                     |                                                                     |     |           |         |             |     |   |   |  |           |   |  |
|------------------------------|---------------------------------------------------------------------|---------------------------------------------------------------------|-----|-----------|---------|-------------|-----|---|---|--|-----------|---|--|
| <b>CLASS Factors</b>         | <b>Instructional Support</b>                                        | Peisner-Feinberg 2008 <sup>11</sup> - NC 07/08                      |     | ❖         | ❖       | ❖           |     |   |   |  |           |   |  |
|                              |                                                                     | Peisner-Feinberg 2013 <sup>12</sup>                                 |     |           |         | ■           | ■   |   | ■ |  |           | ■ |  |
|                              |                                                                     | Xu 2014 <sup>29</sup>                                               | ○○○ |           |         |             |     |   |   |  |           |   |  |
|                              |                                                                     | Aikens 2010 <sup>16,B</sup>                                         |     |           |         | ○○          |     |   |   |  |           |   |  |
|                              |                                                                     | Aikens 2012 <sup>5</sup>                                            |     |           |         | ■ ■ ■ ■ ■ ↓ |     |   |   |  | ■ ■ ■ ■ ■ |   |  |
|                              |                                                                     | Bulotsky-Shearer 2014 <sup>6</sup>                                  | ▲   |           |         | ■ ★         | ■ ★ |   |   |  |           |   |  |
|                              |                                                                     | Burchinal 2014 <sup>7</sup>                                         |     | ■ ■ ● ● ★ |         | ■ ■ ● ● ★   |     |   |   |  |           |   |  |
|                              |                                                                     | Hamre 2014 <sup>10</sup>                                            | ■   |           |         |             |     |   |   |  |           |   |  |
|                              |                                                                     | Peisner-Feinberg 2008 <sup>11</sup> - NC 07/08                      |     | ❖         | ❖       | ❖           |     |   |   |  |           |   |  |
|                              |                                                                     | Peisner-Feinberg 2013 <sup>12</sup>                                 |     |           |         | ■           | ■   |   | ■ |  |           | ■ |  |
|                              | West 2010 <sup>17,B</sup>                                           |                                                                     |     |           | ○○      |             |     |   |   |  |           |   |  |
|                              | Xu 2014 <sup>29</sup>                                               | ○                                                                   |     |           |         |             |     |   |   |  |           |   |  |
|                              | <b>Emotional Climate</b>                                            | Burchinal 2010 <sup>18,A</sup>                                      |     |           |         | ■ ■ ❖ ❖     |     |   |   |  |           |   |  |
|                              |                                                                     | Burchinal 2012 <sup>19</sup> - Whole Sample <sup>A</sup>            |     |           |         | ■           |     |   |   |  |           |   |  |
|                              |                                                                     | Burchinal 2012 <sup>19</sup> - Spanish-English Testing <sup>A</sup> |     |           |         | ★           |     |   |   |  |           |   |  |
|                              |                                                                     | Burchinal 2012 <sup>19</sup> - Spanish-Spanish Testing <sup>A</sup> |     |           |         | ★           |     |   |   |  |           |   |  |
|                              |                                                                     | Dotterer 2012 <sup>20,A</sup>                                       |     |           |         |             |     |   | ■ |  |           |   |  |
|                              |                                                                     | Early 2006 <sup>21,A</sup>                                          |     |           |         |             |     |   | ★ |  |           |   |  |
|                              |                                                                     | Howes 2008 <sup>22,A</sup>                                          |     |           |         |             |     |   |   |  |           |   |  |
|                              |                                                                     | Mashburn, Pianta 2008 <sup>23,A</sup>                               |     |           |         |             |     |   | ■ |  |           |   |  |
| <b>Instructional Climate</b> | Burchinal 2010 <sup>18,A</sup>                                      |                                                                     |     |           | ■ ■ ❖ ❖ |             |     |   |   |  |           |   |  |
|                              | Burchinal 2011 <sup>3</sup> - NCEDL <sup>A</sup>                    |                                                                     |     |           | ⌘       |             |     |   |   |  |           |   |  |
|                              | Burchinal 2012 <sup>19</sup> - Whole Sample <sup>A</sup>            |                                                                     |     |           | ■       |             |     |   |   |  |           |   |  |
|                              | Burchinal 2012 <sup>19</sup> - Spanish English Testing <sup>A</sup> |                                                                     |     |           | ★       |             |     |   |   |  |           |   |  |
|                              | Burchinal 2012 <sup>19</sup> - Spanish-Spanish Testing <sup>A</sup> |                                                                     |     |           | ★       |             |     |   |   |  |           |   |  |
|                              | Dotterer 2012 <sup>20,A</sup>                                       |                                                                     |     |           |         |             |     | ■ |   |  |           |   |  |
|                              | Early 2006 <sup>21,A</sup>                                          |                                                                     |     |           |         |             |     | ★ |   |  |           |   |  |
|                              | Mashburn, Pianta 2008 <sup>23,A</sup>                               |                                                                     |     |           |         |             |     | ■ |   |  |           |   |  |

## A Systematic Review and Meta-Analysis of a Measure of Staff/Child Interaction Quality (the Classroom Assessment Scoring System) in Early Childhood Education and Care Settings and Child Outcomes

|                                 |                          |                             |                                 |  |  |                       |  |  |                                             |  |
|---------------------------------|--------------------------|-----------------------------|---------------------------------|--|--|-----------------------|--|--|---------------------------------------------|--|
| <b>Subscale</b>                 | <b>Language Modeling</b> | Aikens 2010 <sup>16,B</sup> |                                 |  |  | ○○                    |  |  |                                             |  |
|                                 |                          | Aikens 2012 <sup>5</sup>    |                                 |  |  | ■ ■ ■ ■ ■ ↓           |  |  | ■ ■ ■ ■ ■                                   |  |
| <b>Legend for Table</b>         |                          |                             |                                 |  |  |                       |  |  |                                             |  |
| <b>Significant and Positive</b> |                          |                             | <b>Significant and Negative</b> |  |  | <b>Nonsignificant</b> |  |  | <b>Statistic</b>                            |  |
| ★                               |                          |                             | ★                               |  |  | ★                     |  |  | <b>r - Zero Order Pearson's Correlation</b> |  |
| ○                               |                          |                             | ○                               |  |  | ○                     |  |  | <b>Beta</b>                                 |  |
| ■                               |                          |                             | ■                               |  |  | ■                     |  |  | <b>B (Unstandardized Coefficient)</b>       |  |
| ❖                               |                          |                             | ❖                               |  |  | ❖                     |  |  | <b>T-Test</b>                               |  |
| ⌘                               |                          |                             | ⌘                               |  |  | ⌘                     |  |  | <b>Partial Correlation</b>                  |  |
| ↓                               |                          |                             | ↓                               |  |  | ↓                     |  |  | <b>Effect Size</b>                          |  |
| ●                               |                          |                             | ●                               |  |  | ●                     |  |  | <b>F-Ratio</b>                              |  |

Abbreviations: Total Score (factor ver.) = Total Score for Emotional Climate and Instructional Climate; Total Score (9 scale ver.) = Total Score with Language Modeling and Literacy Focus subscales not included. Total Score (8 scale ver.) = Total score with Regard for Student Perspectives, Language Modeling, and Literacy Focus subscales not included. For more details please see Table 2 in the manuscript.

<sup>a</sup>This paper is one of a series of Meta-Analyses and Systematic Reviews assessing the relationship between child care quality and children's outcomes; therefore, superscript letters below are in reference to various large databases that samples in these papers were drawn from. These letters have been kept consistent across the series for our readers.

<sup>b</sup>Samples within papers are described in more detail in the manuscript in Table 2 in the manuscript.

<sup>c</sup>Acronyms for child outcomes are listed in Supplemental Information 2.

<sup>A</sup>National Center for Early Development and Learning Dataset (NCEDL, 2002, 2004); <sup>B</sup>Head Start Family and Children Experiences Survey (FACES, 2006) Cohort; <sup>M</sup>Head Start Family and Children Experiences Survey (FACES, 2009) Cohort; <sup>X</sup>Ohio Virginia (2005-2006, 2006-2007).

# A Systematic Review and Meta-Analysis of a Measure of Staff/Child Interaction Quality (the Classroom Assessment Scoring System) in Early Childhood Education and Care Settings and Child Outcomes

## Supplemental Information 4 Systematic Review Results: All Outcomes

| <b>Table D.</b> CLASS Predicting all Social Emotional Outcomes, Positive Behaviour and Problem Behaviour |                        |                                                  |                               |                        |                     |                                |                           |                           |                  |                          |                                     |                               |                               |                                 |                            |                 |                           |   |
|----------------------------------------------------------------------------------------------------------|------------------------|--------------------------------------------------|-------------------------------|------------------------|---------------------|--------------------------------|---------------------------|---------------------------|------------------|--------------------------|-------------------------------------|-------------------------------|-------------------------------|---------------------------------|----------------------------|-----------------|---------------------------|---|
| CLASS Measurement Level                                                                                  | STUDY <sup>a, b</sup>  | Positive Behaviour <sup>c</sup>                  |                               |                        |                     |                                |                           |                           |                  | Problem Behaviour        |                                     |                               |                               |                                 |                            |                 |                           |   |
|                                                                                                          |                        | ASBI-Prosocial Behaviour                         | ECLS-K Approaches to Learning | Learning Self-Efficacy | Pencil Tapping Task | Social Skills (author created) | SSIS/SSRS – Social Skills | SSBPS – Social Competence | STRS - Closeness | TCRS – Social Competence | Behaviour Problems (author_created) | SSIS – Internalizing Problems | SSIS – Externalizing Problems | SSIS/SSRS - Behaviours Problems | SSBPS – Behaviour Problems | STRS - Conflict | TCRS – Behaviour Problems |   |
| Total Score                                                                                              | Factor Version         | Burchinal 2011 <sup>3</sup> – NCEDL <sup>A</sup> |                               |                        |                     |                                |                           |                           |                  | ■ ■ %                    |                                     |                               |                               |                                 |                            |                 | ■ ■ %                     |   |
|                                                                                                          | 9 Scale Version        | Sabol 2013 <sup>4,A</sup>                        |                               |                        |                     |                                |                           |                           |                  | ○ ★                      |                                     |                               |                               |                                 |                            |                 | ○ ★                       |   |
| CLASS Domains                                                                                            | Classroom Organization | Aikens 2012 <sup>5,M</sup>                       | ■ ■<br>■ ■<br>■ ■ ↓           |                        | ■ ■<br>■ ■<br>■ ■ ↓ |                                |                           |                           |                  | ■ ■<br>■ ■<br>■ ■ ↓      |                                     |                               |                               |                                 |                            |                 | ■ ■<br>■ ■<br>■ ■ ↓       |   |
|                                                                                                          |                        | Burchinal 2014 <sup>7</sup>                      |                               |                        |                     | ★ ● ●<br>■ ■                   |                           |                           |                  | ★ ● ●<br>■ ■             |                                     |                               |                               |                                 |                            |                 |                           |   |
|                                                                                                          |                        | Downer 2012 <sup>9</sup> – DLL <sup>A</sup>      |                               |                        |                     |                                |                           |                           |                  | ■                        |                                     |                               |                               |                                 |                            |                 |                           | ■ |
|                                                                                                          |                        | Downer 2012 <sup>9</sup> – Latino <sup>A</sup>   |                               |                        |                     |                                |                           |                           |                  | ■                        |                                     |                               |                               |                                 |                            |                 |                           | ■ |

## A Systematic Review and Meta-Analysis of a Measure of Staff/Child Interaction Quality (the Classroom Assessment Scoring System) in Early Childhood Education and Care Settings and Child Outcomes

|                              |  |                                                |                      |                             |                      |          |     |   |       |                            |   |        |   |   |     |
|------------------------------|--|------------------------------------------------|----------------------|-----------------------------|----------------------|----------|-----|---|-------|----------------------------|---|--------|---|---|-----|
|                              |  | Hamre 2014 <sup>10</sup>                       |                      |                             | ■                    |          |     | ■ |       |                            |   |        |   | ■ |     |
|                              |  | Hestenes 2015 <sup>36</sup>                    |                      | ■                           |                      |          | ■   |   |       | ■                          | ■ |        |   |   |     |
|                              |  | Peisner-Feinberg 2008 <sup>11</sup> - NC 07/08 |                      |                             |                      |          | ◆   |   |       |                            |   | ◆      |   |   |     |
|                              |  | Peisner-Feinberg 2013 <sup>12</sup>            |                      |                             |                      |          | ■   |   |       |                            |   | ■      |   |   |     |
|                              |  | Weiland 2013 <sup>13</sup>                     |                      |                             | ■ ■<br>■             |          |     |   |       |                            |   |        |   |   |     |
| <b>Emotional Support</b>     |  | Aikens 2012 <sup>5,M</sup>                     | ■ ■<br>■ ■<br>■<br>↓ | ■ ■<br>■ ■<br>■ ■<br>■<br>↓ | ■ ■<br>■ ■<br>■<br>↓ |          |     |   |       | ■<br>■<br>■<br>■<br>■<br>↓ |   |        |   |   |     |
|                              |  | Burchinal 2014 <sup>7</sup>                    |                      |                             | ★ ● ●<br>■ ■         |          |     |   |       | ★<br>● ●<br>■ ■            |   |        |   |   |     |
|                              |  | Curby 2013 <sup>14,A</sup>                     |                      |                             |                      |          |     |   | ★ ■ ■ |                            |   |        |   |   | ■ ★ |
|                              |  | Downer 2012 <sup>9</sup> – DLL <sup>A</sup>    |                      |                             |                      |          |     |   | ■     |                            |   |        |   |   | ■   |
|                              |  | Downer 2012 <sup>9</sup> – Latino <sup>A</sup> |                      |                             |                      |          |     |   | ■     |                            |   |        |   |   | ■   |
|                              |  | Hamre 2014 <sup>10</sup>                       |                      |                             | ■                    |          |     | ■ |       |                            |   |        |   |   | ■   |
|                              |  | Hestenes 2015 <sup>36</sup>                    |                      | ■                           |                      |          | ■   |   |       | ■                          | ■ |        |   |   |     |
|                              |  | Johnson 2013 <sup>37</sup>                     | ■                    |                             |                      |          |     |   |       |                            |   |        |   |   |     |
|                              |  | Peisner-Feinberg 2008 <sup>11</sup> - NC 07/08 |                      |                             |                      |          |     | ◆ |       |                            |   |        | ◆ |   |     |
|                              |  | Peisner-Feinberg 2013 <sup>12</sup>            |                      |                             |                      |          |     | ■ |       |                            |   |        | ■ |   |     |
|                              |  | Reid 2013 <sup>15,A</sup>                      |                      |                             |                      |          |     |   | ○     |                            |   |        |   |   |     |
|                              |  | Weiland 2013 <sup>13</sup>                     |                      |                             |                      | ■ ■<br>■ |     |   |       |                            |   |        |   |   |     |
| <b>Instructional Support</b> |  | Aikens 2010 <sup>16,B</sup>                    |                      |                             |                      |          | ○ ○ |   |       |                            |   | ○<br>○ |   |   |     |
|                              |  | Burchinal 2014 <sup>7</sup>                    |                      |                             |                      | ★<br>● ● |     |   |       |                            |   | ★<br>● |   |   |     |



## A Systematic Review and Meta-Analysis of a Measure of Staff/Child Interaction Quality (the Classroom Assessment Scoring System) in Early Childhood Education and Care Settings and Child Outcomes

|                                   |                          |                             |                                   |                  |  |                       |    |                       |                                             |  |  |                       |  |  |  |  |  |
|-----------------------------------|--------------------------|-----------------------------|-----------------------------------|------------------|--|-----------------------|----|-----------------------|---------------------------------------------|--|--|-----------------------|--|--|--|--|--|
| <b>Subscales</b>                  | <b>Language Modeling</b> | Aikens 2010 <sup>16,B</sup> |                                   |                  |  |                       | ○○ |                       |                                             |  |  | ○○                    |  |  |  |  |  |
|                                   | <b>Positive Climate</b>  | Aikens 2012 <sup>5,M</sup>  |                                   | ■<br>■<br>■<br>↓ |  | ■<br>■<br>■<br>↓      |    | ■<br>■<br>■<br>■<br>↓ |                                             |  |  | ■<br>■<br>■<br>■<br>↓ |  |  |  |  |  |
| <b>Legend for Table</b>           |                          |                             |                                   |                  |  |                       |    |                       |                                             |  |  |                       |  |  |  |  |  |
| <b>Significant &amp; Positive</b> |                          |                             | <b>Significant &amp; Negative</b> |                  |  | <b>Nonsignificant</b> |    |                       | <b>Statistic</b>                            |  |  |                       |  |  |  |  |  |
| ★                                 |                          |                             | ★                                 |                  |  | ★                     |    |                       | <b>r - Zero Order Pearson's Correlation</b> |  |  |                       |  |  |  |  |  |
| ○                                 |                          |                             | ○                                 |                  |  | ○                     |    |                       | <b>Beta</b>                                 |  |  |                       |  |  |  |  |  |
| ■                                 |                          |                             | ■                                 |                  |  | ■                     |    |                       | <b>B (Unstandardized Coefficient)</b>       |  |  |                       |  |  |  |  |  |
| ❖                                 |                          |                             | ❖                                 |                  |  | ❖                     |    |                       | <b>T-Test</b>                               |  |  |                       |  |  |  |  |  |
| ⌘                                 |                          |                             | ⌘                                 |                  |  | ⌘                     |    |                       | <b>Partial Correlation</b>                  |  |  |                       |  |  |  |  |  |
| ●                                 |                          |                             | ●                                 |                  |  | ●                     |    |                       | <b>F-Ratio</b>                              |  |  |                       |  |  |  |  |  |
| ↓                                 |                          |                             | ↓                                 |                  |  | ↓                     |    |                       | <b>Effect Size</b>                          |  |  |                       |  |  |  |  |  |

Abbreviations: Total Score (factor ver.) = Total Score for Emotional Climate and Instructional Climate; Total Score (9 scale ver.) = Total Score with Language Modeling, Literacy Focus subscales not included. For more details please see Table 2 in the manuscript.

<sup>a</sup>This paper is one of a series of Meta-Analyses and Systematic Reviews assessing the relationship between child care quality and children's outcomes; therefore, superscript letters below are in reference to various large databases that samples in these papers were drawn from. These letters have been kept consistent across the series for our readers.

<sup>b</sup>Samples within papers are described in more detail in the manuscript in Table 2.

<sup>c</sup>Acronyms for child outcomes are listed in Supplemental Information 2.

<sup>A</sup>National Center for Early Development and Learning Dataset (NCEDL, 2002, 2004); <sup>B</sup>Head Start Family and Children Experiences Survey (FACES, 20

# A Systematic Review and Meta-Analysis of a Measure of Staff/Child Interaction Quality (the Classroom Assessment Scoring System) in Early Childhood Education and Care Settings and Child Outcomes

## References

1. Carlson SM. Developmentally sensitive measures of executive function in preschool children. *Dev Neuropsychol*. 2005;28(2):595-616. doi:10.1207/s15326942dn2802\_3.
2. Gathercole S, Pickering S. Working memory deficits in children with low achievements in the national curriculum at 7 years of age. *Br J Educ Psychol*. 2000;70(2):177-194. doi:10.1348/000709900158047.
3. Burchinal M, Kainz K, Cai K. How well do our measures of quality predict child outcomes? A meta-analysis and coordinated analysis of data from large-scale studies of early childhood settings. In: Zaslow M, Martinez-Beck I, Tout K, Halle T, eds. *Quality Measurement in Early Childhood Settings*. Baltimore, MD: Paul H Brookes Publishing; 2011:11-31. <http://www.researchconnections.org/childcare/resources/21062>.
4. Sabol T, Soliday Hong S, Pianta R, Burchinal M. Can rating pre-k programs predict children's learning? *Science*. 2013;341(6148):845-846. doi:10.1126/science.1233517.
5. Aikens N, Moiduddin E, Xue Y, Tarullo L, West J. Data tables for child outcomes and classroom quality in FACES 2009 report. OPRE Report 2012- 37b. Washington, DC: Administration for Children and Families; 2012:1-200. [http://www.acf.hhs.gov/sites/default/files/opre/data\\_tables\\_for\\_child\\_outcomes\\_and\\_classroom\\_quality\\_in\\_faces\\_2009.pdf](http://www.acf.hhs.gov/sites/default/files/opre/data_tables_for_child_outcomes_and_classroom_quality_in_faces_2009.pdf). Accessed July 13, 2015.
6. Bulotsky-Shearer R, Bell E, Carter T, Dietrich S. Peer play interactions and learning for low-income preschool children: the moderating role of classroom quality. *Early Educ Dev*. 2014;25(6):815-840. doi:10.1080/10409289.2014.864214.
7. Burchinal M, Vernon-Feagans L, Vitiello V, Greenberg M, The Family Life Project Key Investigators. Thresholds in the association between child care quality and child outcomes in rural preschool children. *Early Child Res Q*. 2014;29(1):41-51. doi:10.1016/j.ecresq.2013.09.004.
8. Dominguez X, Vitiello V, Maier M, Greenfield D. A longitudinal examination of young children's learning behavior: child-level and classroom-level predictors of change throughout the preschool year. *Sch Psychol Rev*. 2010;39(1):29-47.
9. Downer J, López M, Grimm K, Hamagami A, Pianta R, Howes C. Observations of teacher-child interactions in classrooms serving Latinos and dual language learners: applicability of the classroom assessment scoring system in diverse settings. *Early Child Res Q*. 2012;27(1):21-32. doi:10.1016/j.ecresq.2011.07.005.



**A Systematic Review and Meta-Analysis of a Measure of Staff/Child Interaction Quality (the Classroom Assessment Scoring System) in Early Childhood Education and Care Settings and Child Outcomes**

10. Hamre B, Hatfield B, Pianta R, Jamil F. Evidence for general and domain-specific elements of teacher-child interactions: associations with preschool children's development. *Child Dev.* 2014;85(3):1257-1274. doi:10.1111/cdev.12184.
11. Peisner-Feinberg E, Schaaf J. Evaluation of the North Carolina More at Four Pre-Kindergarten Program : performance and progress in the seventh Year (2007-2008). Chapel Hill, NC: FPG Child Development Institute; 2008. [http://fpg.unc.edu/sites/fpg.unc.edu/files/resources/reports-and-policy-briefs/MAF\\_Yr7\\_full\\_report.pdf](http://fpg.unc.edu/sites/fpg.unc.edu/files/resources/reports-and-policy-briefs/MAF_Yr7_full_report.pdf). Accessed July 13, 2015.
12. Peisner-Feinberg E, Schaaf J, LaForett D. Children's growth and classroom experiences in Georgia's pre-k program: findings from the 2011–2012 evaluation study. Chapel Hill, NC: FPG Child Development Institute; 2013. <http://files.eric.ed.gov/fulltext/ED541933.pdf>.
13. Weiland C, Ulvestad K, Sachs J, Yoshikawa H. Associations between classroom quality and children's vocabulary and executive function skills in an urban public prekindergarten program. *Early Child Res Q.* 2013;28(2):199-209. doi:10.1016/j.ecresq.2012.12.002.
14. Curby T, Brock L, Hamre B. Teachers' emotional support consistency predicts children's achievement gains and social skills. *Early Educ Dev.* 2013;24(3):292-309. doi:10.1080/10409289.2012.665760.
15. Reid J, Ready D. High-quality preschool: the relationship between the socioeconomic composition of preschool classrooms and children's learning. *Early Educ Dev.* 2013;24(8):1082-1111. doi:10.1080/10409289.2012.757519.
16. Aikens N, Tarullo L, Hulseley L, Ross C, West J, Xue Y. ACF-ORPRE Report: a year in Head Start: children, families and programs. Washington DC: Administration for Children and Families; 2010:1-36. <http://files.eric.ed.gov/fulltext/ED517213.pdf>. Accessed July 13, 2015.
17. West J, Malone L, Hulseley L, Aikens N, Tarullo L. ACF-OPRE Report: Head Start children go to kindergarten. Washington, DC: U.S. Department of Health and Human Services, Administration for Children and Families, Office of Planning, Research and Evaluation; 2010. [http://www.acf.hhs.gov/sites/default/files/opre/hs\\_kindergarten.pdf](http://www.acf.hhs.gov/sites/default/files/opre/hs_kindergarten.pdf).
18. Burchinal M, Vandergrift N, Pianta R, Mashburn A. Threshold analysis of association between child care quality and child outcomes for low-income children in pre-kindergarten programs. *Early Child Res Q.* 2010;25(2):166-176. doi:10.1016/j.ecresq.2009.10.004.
19. Burchinal M, Field S, López M, Howes C, Pianta R. Instruction in Spanish in pre-kindergarten classrooms and child outcomes for English language learners. *Early Child Res Q.* 2012;27(2):188-197. doi:10.1016/j.ecresq.2011.11.003.

**A Systematic Review and Meta-Analysis of a Measure of Staff/Child Interaction Quality (the Classroom Assessment Scoring System) in Early Childhood Education and Care Settings and Child Outcomes**

20. Dotterer A, Burchinal M, Bryant D, Early D, Pianta R. Universal and targeted pre-kindergarten programmes: a comparison of classroom characteristics and child outcomes. *Early Child Dev Care*. 2012;183(7):931-950. doi:10.1080/03004430.2012.698388.
21. Early D, Bryant D, Pianta R, et al. Are teachers' education, major, and credentials related to classroom quality and children's academic gains in pre-kindergarten? *Early Child Res Q*. 2006;21(2):174-195. doi:10.1016/j.ecresq.2006.04.004.
22. Howes C, Burchinal M, Pianta R, et al. Ready to learn? children's pre-academic achievement in pre-kindergarten programs. *Early Child Res Q*. 2008;23(1):27-50. doi:10.1016/j.ecresq.2007.05.002.
23. Mashburn A, Pianta R, Hamre B, et al. Measures of classroom quality in prekindergarten and children's development of academic, language, and social skills. *Child Dev*. 2008;79(3):732-749. doi:10.1111/j.1467-8624.2008.01154.x.
24. Burchinal M, Howes C, Pianta R, et al. Predicting child outcomes at the end of kindergarten from the quality of pre-kindergarten teacher-child interactions and instruction. *Appl Dev Sci*. 2008;12(3):140-153. doi:10.1080/10888690802199418.
25. Dang T, Farkas G, Burchinal M, et al. Preschool center quality and school readiness: quality main effects and variation by demographic and child characteristics. Society for Research on Educational Effectiveness; 2011. <http://eric.ed.gov/?id=ED519004>. Accessed July 13, 2015.
26. Keys T, Farkas G, Burchinal M, et al. Preschool center quality and school readiness: quality effects and variation by demographic and child characteristics. *Child Dev*. 2013;84(4):1171-1190. doi:10.1111/cdev.12048.
27. McGinty A, Justice L, Piasta S, Kaderavek J, Fan X. Does context matter? explicit print instruction during reading varies in its influence by child and classroom factors. *Early Child Res Q*. 2012;27(1):77-89. doi:10.1016/j.ecresq.2011.05.002.
28. Hamre B, Justice L, Pianta R, et al. Implementation fidelity of MyTeachingPartner literacy and language activities: association with preschoolers' language and literacy growth. *Early Child Res Q*. 2010;25(3):329-347. doi:10.1016/j.ecresq.2009.07.002.
29. Xu Y, Chin C, Reed E, Hutchinson C. The effects of a comprehensive early literacy project on preschoolers' language and literacy skills. *Early Child Educ J*. 2014;42(5):295-304. doi:10.1007/s10643-013-0613-6.
30. Guo Y, Piasta S, Justice L, Kaderavek J. Relations among preschool teachers' self-efficacy, classroom quality, and children's language and literacy gains. *Teach Teach Educ*. 2010;26(4):1094-1103. doi:10.1016/j.tate.2009.11.005.

**A Systematic Review and Meta-Analysis of a Measure of Staff/Child Interaction Quality (the Classroom Assessment Scoring System) in Early Childhood Education and Care Settings and Child Outcomes**

31. Gosse C, McGinty A, Mashburn A, Hoffman L, Pianta R. The role of relational and instructional classroom supports in the language development of at-risk preschoolers. *Early Educ Dev.* 2014;25(1):110-133. doi:10.1080/10409289.2013.778567.
32. Logan J, Piasta S, Justice L, Schatschneider C, Petrill S. Children's attendance rates and quality of teacher-child interactions in at-risk preschool classrooms: contribution to children's expressive language growth. *Child Youth Care Forum.* 2011;40(6):457-477. doi:10.1007/s10566-011-9142-x.
33. Mashburn A, Justice L, Downer J, Pianta R. Peer effects on children's language achievement during pre-kindergarten. *Child Dev.* 2009;80(3):686-702. doi:10.1111/j.1467-8624.2009.01291.x.
34. Dobbs-Oates J, Kaderavek J, Guo Y, Justice L. Effective behavior management in preschool classrooms and children's task orientation: enhancing emergent literacy and language development. *Early Child Res Q.* 2011;26(4):420-429. doi:10.1016/j.ecresq.2011.02.003.
35. Guo Y, Tompkins V, Justice L, Petscher Y. Classroom age composition and vocabulary development among at-risk preschoolers. *Early Educ Dev.* 2014;25(7):1016-1034. doi:10.1080/10409289.2014.893759.
36. Hestenes L, Kintner-Duffy V, Wang Y, et al. Comparisons among quality measures in child care settings: understanding the use of multiple measures in North Carolina's QRIS and their links to social-emotional development in preschool children. *Early Child Res Q.* 2015;30(Part B):199-214. doi:10.1016/j.ecresq.2014.06.003.
37. Johnson S, Seidenfeld A, Izard C, Kobak R. Can classroom emotional support enhance prosocial development among children with depressed caregivers? *Early Child Res Q.* 2013;28(2):282-290. doi:10.1016/j.ecresq.2012.07.003.
