# Supplementary material for: A Systematic Review and Meta-Analysis of a Measure of Staff/Child Interaction Quality (the Classroom Assessment Scoring System) in Early Childhood Education and Care Settings and Child Outcomes
Source: PubMed Central journal article supplement (PMC5201239; doi:10.1371/journal.pone.0167660), 2016-12-30
Supplement: pone.0167660.s005.pdf [file pone.0167660.s005.pdf]

**A Systematic Review and Meta-Analysis of a Measure of Staff/Child Interaction Quality  
(the Classroom Assessment Scoring System) in Early Childhood Education and Care  
Settings and Child Outcomes**

**Supplemental Information 5**

| <b>List of Acronyms Used in the Description of Studies</b> |                                                                                                                                                                                                                                                                                                                                                                                                                                                                                                                                                                          |
|------------------------------------------------------------|--------------------------------------------------------------------------------------------------------------------------------------------------------------------------------------------------------------------------------------------------------------------------------------------------------------------------------------------------------------------------------------------------------------------------------------------------------------------------------------------------------------------------------------------------------------------------|
| <b>Acronym Category</b>                                    | <b>Full Name</b>                                                                                                                                                                                                                                                                                                                                                                                                                                                                                                                                                         |
| <b>Journals</b>                                            | Applied Developmental Science (ADS)<br>Child Development (CD)<br>Child & Youth Care Forum (CYCF)<br>Early Child Development and Care (ECDC)<br>Early Education and Development (EED)<br>Early Childhood Research Quarterly (ECRQ)<br>School Psychology Review (SPR)<br>Teaching and Teacher Education (T&TE)                                                                                                                                                                                                                                                             |
| <b>Large Samples</b>                                       | Head Start Family and Children Experiences Study (FACES)<br>National Center for Early Development (NCEDL)<br>North Carolina (NC)<br>Study of State-Wide Early Education Programs (SWEEP)                                                                                                                                                                                                                                                                                                                                                                                 |
| <b>Covariates</b>                                          | Applied Problems (AP)<br>Bachelor of Arts (BA)<br>Developmentally Appropriate Beliefs (DAP)<br>Dual Language Learner (DLL)<br>Early Childhood Education (ECE)<br>Environment Rating Scales (ECERS)<br>Environment Rating Scales-Revised (ECERS-R)<br>English Language Learner (ELL)<br>Head Start (HS)<br>Home Observation of the Measurement of the Environment (HOME)<br>Masters of Arts (MA)<br>Peabody Picture Vocabulary Test (PPVT)<br>Relational Support (RS)<br>Socio-Economic Status (SES)<br>Standard Deviation (SD)<br>Woodcock Johnson Achievement Test (WJ) |
